# Supplementary material for: Study of Fluorinated Quantum Dots-Protein Interactions at the Oil/Water Interface by Interfacial Surface Tension Changes
Source: Materials (Basel). 2018 May 8;11(5):750. doi: 10.3390/ma11050750 (PMC5978127; doi:10.3390/ma11050750)
Supplement: Supplementary file 1 [file materials-11-00750-s001.pdf]

## Supplementary Materials

# Study of Fluorinated Quantum Dots-Protein Interactions at the Oil/Water Interface by Interfacial Surface Tension Changes

Carolina Carrillo-Carrión <sup>1,2,\*</sup>, Marta Gallego <sup>2</sup>, Wolfgang J. Parak <sup>2,3</sup> and Mónica Carril <sup>2,4</sup>

- <sup>1</sup> Centro Singular de Investigación en Química Biológica y Materiales Moleculares (CiQUS) y Departamento de Física de Partículas, Universidad de Santiago de Compostela, 15782 Santiago de Compostela, Spain
- <sup>2</sup> Bioengineered Particles Group, CIC biomaGUNE, 20014 San Sebastian, Spain; mgallego@cicbiomagune.es (M.G.); wolfgang.parak@uni-hamburg.de (W.J.P.); mcarril@cicbiomagune.es (M.C.)
- <sup>3</sup> Fachbereich Physik and CHyN, Universität Hamburg, 22607 Hamburg, Germany
- <sup>4</sup> Ikerbasque, Basque Foundation for Science, 48011 Bilbao, Spain
- \* Correspondence: carolina.carrillo@usc.es; Tel.: +34-881-815-770

## I. Additional Figures

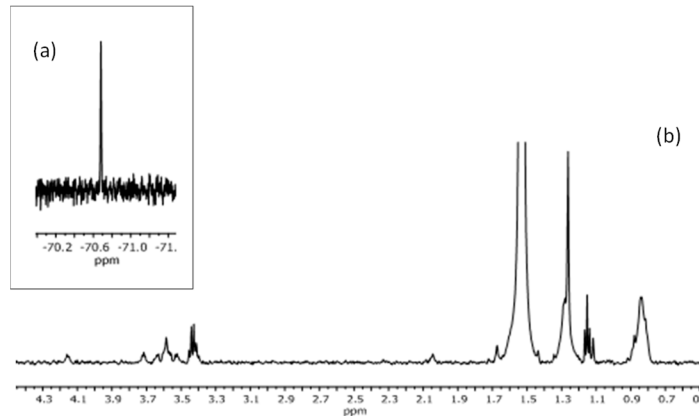

**Figure S1.** (a) <sup>19</sup>F NMR spectrum and (b) <sup>1</sup>H NMR spectrum of QD\_F, both recorded in CD<sub>2</sub>Cl<sub>2</sub>.

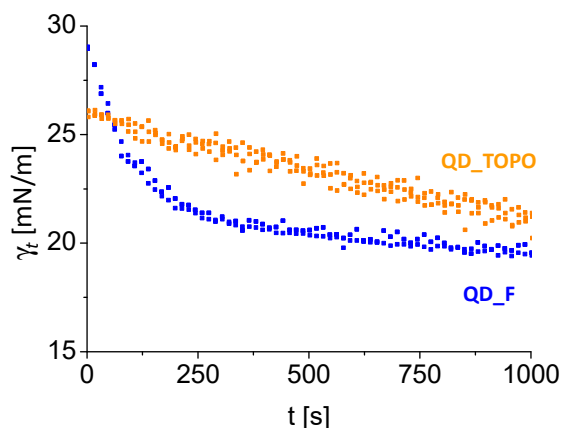

**Figure S2.** Time dependence of the interfacial tension (IFT)  $\gamma_t$  for QD\_F (100 nM in DCM) and QD\_TOPO (100 nM in DCM) immersed in aqueous buffer solution at pH 5 in the absence of proteins. Measurements were performed in triplicate.

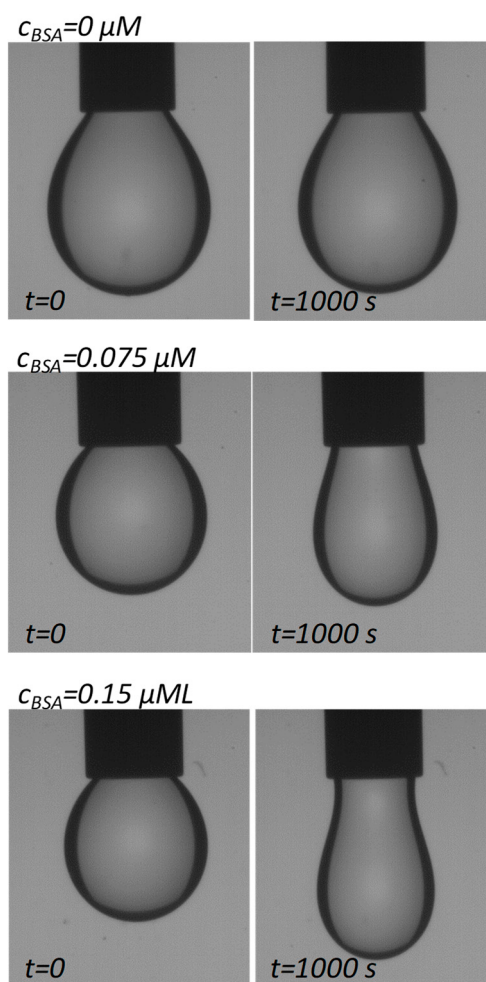

**Figure S3.** Example images of the change of the drop sample with the NPs (QD\_F NPs at 100 nM in DCM) immersed in aqueous buffer solutions at pH 5 with different BSA concentrations from the initial time ( $t=0$ ) to the final measured time ( $t=1000$  s) when the meso-equilibrium is reached. The diameter of the Hamilton needle is 1.8 mm (stainless steel NE45; Krüss-scientific).

## II. Calculation of the concentration of CdSe/ZnSQDs from ICP-MS data

Quantitative elemental analysis of the CdSe/ZnS nanoparticles was performed by inductively coupled plasma mass spectrometry (ICP-MS) after digestion of the sample with aqua regia (i.e., concentrated HCl (35 wt%) and HNO<sub>3</sub> (67 wt%) in 3:1 volume ratio). Before the analysis of the sample, a proper calibration was performed using standards of the elements to be measured, which are Cd, Se, and Zn in the case of CdSe/ZnS nanoparticles. Note that due to the difficulty to determine S in a reliable a sensitive way we assumed that the ratio Zn:S is 1:1.

The data obtained from ICP-MS analysis are the mass of each element in the NP solution of volume V ( $m_{Cd}$ ,  $m_{Se}$ ,  $m_{Zn}$ ). Taking into account that the molar stoichiometry Zn:S is assumed to be 1:1 in the NP, the mass of elemental sulphur in solution can be calculated as:

$$m_S = (m_{Zn} \cdot M_S) / M_{Zn}$$

Hereby  $M_S$  and  $M_{Zn}$  are the atomic weight of sulphur and zinc, respectively.

On the one hand, the mass of CdSe cores in solution is:

$$m_{CdSe} = m_{Cd} + m_{Se}$$

Using the density of CdSe ( $\rho_{CdSe} = 5.82 \text{ g/cm}^3$ ) and the mass of CdSe in solution, the volume of all the CdSe cores ( $V_{CdSe}$ ) in solution can be calculated as:

$$V_{CdSe} = m_{CdSe} / \rho_{CdSe}$$

On the other hand, the mass of ZnS (i.e. shell of the NP) in solution is:

$$m_{ZnS} = m_{Zn} + m_S$$

In the same way, using the density of ZnS ( $\rho_{ZnS} = 4.09 \text{ g/cm}^3$ ) and the mass of ZnS in solution, the volume of the ZnS shell ( $V_{ZnS}$ ) in solution can be calculated as:

$$V_{ZnS} = m_{ZnS} / \rho_{ZnS}$$

Thus, the total volume of all the core/shell NPs ( $V_{t,NP}$ ) is:

$$V_{t,NP} = V_{CdSe} + V_{ZnS}$$

Considering an average NP diameter of  $d_c = 4.9 \text{ nm}$  as obtained by TEM and taking into account the spherical shape of the core/shell CdSe/ZnS NPs, the volume of one NP ( $V_{NP}$ ) with inorganic core/shell (CdSe/ZnS) diameter  $d$  is:

$$V_{NP} = 4/3 \cdot \pi \cdot (d_c/2)^3$$

Knowing the total volume of NPs in solution ( $V_{t,NP}$ ) and the volume of one NP ( $V_{NP}$ ), the total number of NPs in solution ( $N_{NP}$ ) can be calculated as:

$$N_{NP} = V_{t,NP} / V_{NP}$$

Then, the molar concentration of CdSe/ZnS NPs ( $N_{NP}$ ) in the solution of volume V is determined as:

$$C_{NP} = N_{NP}/N_A/V$$

Hereby  $N_A$  is the Avogadro constant. Note that in this volume based-calculation the core/shell geometry is not included, which due to the different densities of CdSe and ZnS introduces some error.
